# 1 **A novel enhancer RNA, Hmrhl, positively regulates its host gene, *phkb*, in** 2 **Chronic Myelogenous Leukemia**

3  
4 Roshan Fatima, Subhendu Roy Choudhury, Divya T. R., Utsa Bhaduri and M. R. S. Rao,  
5 Jawaharlal Nehru Centre for Advanced Scientific Research ( JNCASR), Bangalore.

## 6 7 **Abstract**

8 Noncoding RNAs are increasingly being accredited with key roles in gene regulation during  
9 development and disease. Here we report the discovery and characterization of a novel long  
10 noncoding RNA, Hmrhl, which shares synteny and partial sequence similarity with the mouse  
11 lncRNA, Mrhl. The human homolog, Hmrhl, transcribed from intron 14 of *phkb* gene, is  
12 5.5kb in size, expressed in all tissues examined and has acquired additional repeat elements.  
13 Analysis of Hmrhl locus using ENCODE database revealed that it is associated with  
14 hallmarks of enhancers like the open chromatin configuration, binding of transcription  
15 factors, enhancer specific histone signature etc. in the K562 Chronic Myelogenous Leukemia  
16 (CML) cells. We compared the expression of Hmrhl in the normal lymphoblast cell line,  
17 GM12878, with that of K562 cells and lymphoma samples and show that it is highly  
18 upregulated in leukemia as well as several cases of lymphoma. We validated the enhancer  
19 properties of Hmrhl locus in K562 cells with the help of Luciferase assay. Moreover, siRNA  
20 mediated down-regulation of Hmrhl in K562 cells leads to a concomitant down regulation of  
21 its parent gene, *phkb*, showing that Hmrhl functions as an enhancer RNA and positively  
22 regulates its host gene, *phkb*, in chronic myelogenous leukemia.

## 23 **Introduction**

24 Genome projects in recent years have revealed the fact that mammalian genome is transcribed  
25 virtually in entirety, but only a fraction of it is translated<sup>1</sup>, thus generating a plethora of  
26 noncoding RNAs (both long and short noncoding RNAs), the functions of a vast majority of

27 which are yet to be determined. There has been a recent spurt in the studies of long noncoding  
28 RNAs (lncRNAs), demonstrating diverse roles not only in gene regulation during  
29 development and disease but also in evolution and complexity of organisms<sup>2-3</sup>. Enhancers  
30 constitute one such category of regulatory noncoding sequences that enhance the expression  
31 of their coding counterparts irrespective of their position, orientation and distance<sup>4-6</sup>. Any  
32 variation in enhancer sequence could lead to altered gene expression and consequent disease  
33 conditions<sup>7</sup>. Besides, super enhancers have been identified which consist of clusters of  
34 enhancers that are mainly associated with genes that define cell identity<sup>8-10</sup>. Recently, it has  
35 been observed that enhancers are actively transcribed giving rise to enhancer RNAs (eRNAs),  
36 making them the latest addition to the ever expanding list of regulatory noncoding RNAs. The  
37 eRNAs play a critical role in enhancer-promoter looping to bring about the activation of  
38 neighbouring protein coding genes<sup>11-14</sup>. In fact the enigmatic association of the gene desert  
39 loci with cancer has now been attributed to the enhancer derived long noncoding RNAs  
40 transcribed from the gene desert loci. For example, the 8q24 gene desert locus is known to  
41 give rise to several tissue specific long noncoding RNAs in different human cancers. CCAT1-  
42 L (Colorectal Cancer Associated Transcript-1) is one such enhancer RNA transcribed from a  
43 super enhancer region of 8q24 gene desert and has been shown to mediate long range  
44 chromatin interactions of Myc oncogene with its enhancers<sup>15</sup>. Further, a set of lncRNAs  
45 named as CARLoS (Cancer-Associated Region Long noncoding RNAs) is also known to be  
46 transcribed from the 8q24 gene desert region. One of them, CARLo5 is an oncogenic  
47 lncRNA associated with increased susceptibility to cancer and has been shown to be involved  
48 in long range chromatin interactions between Myc enhancer region and the promoter region  
49 of CARLo-5<sup>16</sup>.

50 Our lab had previously identified an intronic long noncoding RNA, Mrhl (Meiotic  
51 recombination hot spot locus RNA) in mouse<sup>17</sup>. The Mrhl lncRNA is 2.4kb in size and

52 expressed in multiple tissues in mouse and is shown to be nuclear restricted<sup>18</sup>. Diverse roles  
53 have been attributed to Mrhl in cellular processes and signalling pathways. For example, it  
54 has been reported that Mrhl negatively regulates Wnt signalling in mouse spermatogonial  
55 cells through its interaction with p68 RNA helicase<sup>19</sup>. Conversely, the regulation of  
56 Mrhl by Wnt signalling has also been reported<sup>20</sup>. Moreover, genome wide  
57 chromatin occupancy of Mrhl and its role in gene regulation has been explored<sup>21</sup>. Very  
58 recently, the role of Mrhl in regulation of Sox8 expression and meiotic commitment of  
59 spermatogonial cells has been described<sup>22</sup>. In the current communication, we report the  
60 identification and characterization of its human homolog, Hmrhl, and show that Hmrhl  
61 functions as an enhancer RNA for its host gene, *phkb*, in K562 Chronic Myelogenous  
62 Leukemia cells.

## 63 **Results**

### 64 **Syntenic Conservation of Mrhl in humans within the *phkb* gene**

65 The Mrhl long noncoding RNA is transcribed from the intron 15 of the *phkb* gene located on  
66 chromosome 8 in mouse (Fig1.i). Noncoding RNAs are poorly conserved across species and  
67 it had earlier been reported from our lab that the Mrhl lncRNA is not conserved in human<sup>18</sup>.  
68 However, a low stringency blast of Mrhl sequence revealed that it is partially conserved in  
69 human within the same host gene, *phkb*, thus sharing synteny (Fig1.ii). The human homolog  
70 is transcribed from the intron 14 of the *phkb* gene (with respect to transcript # 201, the  
71 longest transcript of *phkb*, ENSEMBLE genome browser; Fig1.iii). The sequence from the  
72 middle region of Mrhl to the 3'end is conserved in human as two segments, with 71%  
73 identity over a stretch of 152bp and 65% identity over a stretch of 1223bp (Fig.1.iv-v).  
74 Therefore, the mouse Mrhl long noncoding RNA shares both synteny and partial sequence  
75 similarity with its human homolog, which we have named as human Mrhl or Hmrhl.

76 **Hmrhl is expressed in multiple human tissues**

77 Once it became clear that the Mrhl sequence is conserved in human, we were curious to  
78 know whether the human homolog is expressed. For this, a cDNA panel of 16 different  
79 human tissues was obtained (Clontech, USA) and used to examine the expression of Hmrhl  
80 by quantitative Real Time PCR (qRT-PCR). Glycerldehyde-3-phosphate dehydrogenase  
81 (GAPDH) was used as an internal control and the data was plotted following the standard  $2^{-\Delta\Delta CT}$   
82  $\Delta\Delta CT$  method. Low level of Hmrhl expression (high cT values) was indeed observed in all of  
83 the human tissues examined (Fig.2a). Among all, the Hmrhl expression was highest in  
84 Spleen and Pancreas followed by Testis and other tissues (Fig.2a).

85 **Hmrhl is 5523bp in size, much larger than its mouse homolog**

86 For a detailed characterization of Hmrhl lncRNA, we used the most commonly available  
87 commercial cell line, human embryonic kidney cells (HEK293T) as well as the K562 CML  
88 cells. Hmrhl sequence was cloned in pGEM3Zf(+) vector to generate a template for a  
89 northern probe. The Hmrhl specific probe detected a single band in the northern blot  
90 indicating the presence of the Hmrhl transcript (Fig.2b), the size of which was much larger  
91 (~5kb) as compared to Mrhl (2.4kb). In order to determine the exact size of Hmrhl lncRNA,  
92 Primer Walking method was further employed to reach the ends of Hmrhl cDNA from the  
93 middle conserved region. Commercially available panel of human cDNA of different tissues  
94 (Clontech, USA), as well as the HEK293T cDNA was used in combination with different  
95 overlapping sets of primers (Fig.S1). This experiment revealed the size of Hmrhl to be  
96 5523bp, corresponding to chr16: 47658923-47664446 on GRCh37/ hg19, the genome  
97 build available at the time of mapping and chr16: 47625012-47630534 on GRCh38/ hg38, the  
98 current genome build. The sequence for Hmrhl is submitted to the NCBI (Genbank ID  
99 MF784605, FigS2).

100 We next investigated the coding potential of Hmrhl with NCBI ORF Finder which showed  
101 the presence of 1510bp long ORF (Fig.S3), though its translation is highly unlikely as  
102 discussed in supplementary data. To further examine the plausible coding potential of Hmrhl,  
103 the online tools CPAT analysis (Fig. S4) and PhyloCSF were used (see methods section for  
104 details) showing and strongly advocating that no approximate coding regions or novel coding  
105 regions are present (Fig.2c).

106 Syntenic conservation of Hmrhl allowed us to further explore its sequence conservation  
107 across species through evolution. Phylogenetic tree for Hmrhl was generated using Circular  
108 phylogenetic tree built in iTOL (Interactive Tree of Life), as shown in Fig.2d. Among the  
109 twenty-three-selected species, the Hmrhl sequence seems to have its closest similarity with  
110 the conserved region present in the Gorilla followed by Chimp, although the single exonic  
111 Hmrhl carries a definite region that appears to be highly conserved among primates.

#### 112 **Analysis of Hmrhl locus using ENCODE portal**

113 Data from the ENCODE Project Consortium<sup>1</sup> (visualized through the UCSC genome  
114 browser) was analysed exhaustively with respect to the Hmrhl cytogenetic region and the  
115 parent *phkb* gene to gain an insight into the structural and functional properties of Hmrhl.  
116 Remarkably, the ENCODE database revealed several interesting facts about Hmrhl genomic  
117 interval as discussed below.

#### 118 **Hmrhl has acquired several repeat elements during evolution**

119 A comparison of the genomic sequences in and around Hmrhl region from lower to higher  
120 vertebrates shows that the sequence appears to have been acquired initially in lower  
121 mammals like platypus during evolution and then evolved rapidly by insertion of repeat  
122 elements, especially in primates. Hmrhl has acquired seven different repeat elements in  
123 humans, L2b, L2c, MIR, Charlie 15a, AluY, L1PA3 and AluSx (Repeat Masker), which

124 flank the unique central region (Fig3). While the central region is highly conserved from  
125 lower to higher mammals, the repeat elements present in Hmrhl are absent in lower  
126 organisms, including rodents. The mouse homolog has only one repeat element, RLT,  
127 which is not present in Hmrhl (data not shown).

### 128 **Hmrhl locus exhibits hallmarks of enhancer in K562 CML cells**

129 Encode database represents a true encyclopaedia of DNA elements and offers valuable  
130 information regarding various properties of the chromatin like DNase hypersensitive sites,  
131 transcription factor binding sites and transcriptional status, histone signature etc., across  
132 different cell types; through diverse organisms.

133 Interestingly, ENCODE database shed light on the fact that Hmrhl locus exhibits hallmarks  
134 of enhancers in the Chronic Myelogenous Leukemia cell line, K562. Hmrhl locus is  
135 associated with open chromatin configuration and the presence of DNase hypersensitive  
136 sites in the K562 cells but not so in the normal lymphoblast cell line, GM12878 (Fig.4a).  
137 Moreover, Hmrhl locus exhibits the binding of EP300, histone signatures H3K27Ac and  
138 H3K4Me1 that mark the enhancers as well as the H3K4Me3 signal, which marks the  
139 promoters, in K562 cells (Fig.4a). Particularly, the H3K27Ac enhancer mark is in the form  
140 of two distinct peaks at the 5' end of Hmrhl (Fig.4a). We validated these enhancer marks at  
141 Hmrhl locus using ChIP-Seq (Fig4 b-c). Furthermore, Chip-seq data from ENCODE shows  
142 the binding of RNA polymerase II and an array of transcription factors, namely, GATA1,  
143 PML, CCNT2, NR2F2, TRIM28, STAT5A, ATF1, cMyc, GATA2, IRF1, JUND, EGR1,  
144 RCOR1, BHLHE40, YY1, TAL1, REST, TEAD4, MAFF, MAX and Egr1 at the 5' end of  
145 Hmrhl (genomic co-ordinates ~chr16:47,658,800-47,659,606) in the K562 cell line  
146 (Fig.5a). Notably, most of these transcription factors have been linked to cancer in previous  
147 studies<sup>23-25</sup>. It is well known that transcription factors initially bind to enhancer elements and

148 recruit RNA PolIII and co-activators to target gene promoters through looping<sup>26-31</sup>. EP300 is  
149 a histone acetyl transferase, a transcriptional coactivator and a chromatin re-modeller known  
150 to be enriched at active enhancers and to increase gene transcription by relaxing the  
151 chromatin and recruiting the transcriptional machinery<sup>32-33</sup>. All these observations strongly  
152 suggested that Hmrhl locus is transcriptionally highly active in K562 leukemic cells and that  
153 it possesses regulatory properties.

154 One of the most significant disclosures of the Encode portal with respect to the Hmrhl is the  
155 fact that the Hmrhl locus loops and interacts with the promoter of its parent gene, *phkb*, in  
156 K562 leukemia cells, thus acting as an enhancer for *phkb* gene. This fact was revealed  
157 through the ChiaPET (Chromatin interaction analysis with Paired End Tag sequencing, a  
158 combination of ChIPseq and 5C, Fig.5b-d) data of ENCODE project.

159 With this background information regarding Hmrhl locus from the Encode database as  
160 described above, we set out to elucidate its functional properties. We examined the  
161 expression profile of Hmrhl across various human cancers using a cancer specific cDNA  
162 panel (Origene, USA) by real time qPCR. Actin was used as an internal reference control.  
163 We observed different degrees of variation in the level of Hmrhl expression between  
164 normal and cancer samples under various cancers conditions. Significantly, it was observed  
165 that Hmrhl was highly upregulated in a number of lymphoma samples suggesting an  
166 active role for this RNA in solid tumors of blood cancer (Fig.6a). In addition, we  
167 compared the expression of Hmrhl and PHKB in the GM12878 and K562 cells by real  
168 time qPCR and found that both are over expressed in K562 leukemia cells as  
169 compared to normal lymphoblast (Fig.6 b-c).

170 **Luciferase assay validated the enhancer properties of Hmrhl locus**

171 In order to further ascertain the enhancer properties of *Hmrhl* genomic locus, we obtained  
172 the promoter and enhancer specific vectors pGL4.10 and pGL4.23, respectively (Promega,  
173 USA) for a luciferase assay. The pGL4.10 promoter vector does not possess any promoter,  
174 and hence can be used to identify promoter properties of any given DNA sequence when  
175 cloned upstream of the luciferase gene while the pGL4.23 enhancer vector has a minimal  
176 promoter upstream of luciferase gene and hence can be used to examine if a sequence of  
177 DNA has enhancer properties.

178 Three clones each for the promoter and enhancer vectors were generated using sequences in  
179 the 5' end of *Hmrhl* as inserts. Insert-1 had a sequence of -1000bp upstream of the 5' end of  
180 *Hmrhl*. Insert-2 included a sequence of +1 to +500bp downstream of the 5' end of *Hmrhl*  
181 (the region where various transcription factors and PolII were shown to bind by the Encode  
182 project), along with -300bp upstream sequence (800bp insert). Insert-3 included -1000bp  
183 upstream sequence and +500bp downstream sequences (1500bp insert). These inserts were  
184 cloned into the promoter and enhancer vectors, transfected in K562 cells and luciferase assay  
185 was performed to examine if any of these DNA sequences had regulatory properties.

186 Insert-1 did not generate any luciferase signal in combination with either promoter or  
187 enhancer vector, thus revealing that the -1000bp genomic sequence alone, upstream of the  
188 *Hmrhl* start site, has neither promoter nor enhancer properties. Insert-2 produced moderate  
189 signal both with promoter and enhancer vectors, suggesting that transcription factors and  
190 PolII indeed bound to this region, as also revealed in ENCODE database. Interestingly, an  
191 intense signal of luciferase activity was obtained with insert-3 (1.5kb) in combination with  
192 enhancer vector but not with promoter vector, confirming the fact that the sequences at the 5'  
193 end of *Hmrhl* indeed have strong enhancer properties (Fig.7a).

194 ***Hmrhl* functions as an enhancer RNA for *phkb***



195 After confirming the enhancer properties of Hmrhl locus by luciferase assay, we went on to  
196 probe if only the genomic segment has the regulatory properties, or the transcript arising  
197 from this region also takes part in the positive regulation of its parent gene, *phkb*. Specific  
198 siRNAs against the Hmrhl lncRNA were obtained in order to silence it. A pool of four  
199 different siRNAs was used to down regulate Hmrhl in K562 cells and its effect on PHKB  
200 expression was examined through quantitative PCR. PHKB was indeed found to be down-  
201 regulated upon down-regulation of Hmrhl, confirming the fact that Hmrhl acts as an  
202 enhancer RNA and positively regulates its parent *phkb* gene in K562 cells (Fig.7b). This  
203 experiment clearly established the role of Hmrhl as an enhancer RNA involved in the  
204 regulation of its host protein coding gene. Moreover, using another set of siRNAs (targeting  
205 different region of Hmrhl), we observed the similar down regulation of PHKB upon  
206 knockdown of Hmrhl (Fig.7c). We further probed if the PHKB expression is affected upon  
207 downregulation of Hmrhl in the GM12878 normal lymphoblast cells as well and found that  
208 PHKB is not down regulated in GM12878 cells unlike in K562 leukemia cells (Fig.7 d).

## 209 **Discussion**

210 Enhancers are mainly cis regulatory elements involved in the spatio-temporal regulation of  
211 gene expression. Enhancer derived transcripts were described initially way back in early  
212 1990s when it was reported that the HS2 enhancer of K562 cells gives rise to long enhancer  
213 transcripts<sup>34</sup>. Yet there had been a long silence in the discoveries and understanding related  
214 to enhancers and their probable mechanism of action. In fact enhancers were perceived only  
215 as segments of DNA<sup>4</sup> and the prospect of their transcription and a critical role for those  
216 transcripts in gene regulation was not envisaged. The discovery of enhancer RNAs came  
217 about rather recently, in 2010, with two papers describing the enhancer generated transcripts  
218 in mouse and human, respectively<sup>11-12</sup>. Since then, there has been a surge in studies related to

219 enhancer RNAs which endorse the fact that enhancer function is mediated through enhancer  
220 transcripts, changing the way we appreciate mechanism of gene regulation<sup>14, 35-40</sup>.

221 In the present communication, we report the identification and characterization of the  
222 human homolog, Hmrhl, of the mouse long noncoding RNA, Mrhl and show that Hmrhl  
223 functions an enhancer RNA for its host gene. Both the Mrhl as well as Hmrhl lncRNAs are  
224 transcribed from the introns of the same protein coding gene, *phkb*. Remarkably, as many  
225 as 50% of human protein coding genes are known to act as hosts for noncoding RNA genes  
226 including micro RNAs, small nucleolar RNAs and lncRNAs<sup>41</sup>.

227 Recent reports have implicated a large number of long noncoding RNAs in the pathogenesis  
228 of various cancers<sup>42</sup>. Our current observations with experiments involving luciferase  
229 assay and siRNA mediated RNA interference, in the back drop of ENCODE data,  
230 clearly establish that Hmrhl functions an enhancer RNA and positively regulates its  
231 parental *phkb* gene.

232 Though siRNAs are known to have off target effects, the fact that two different pools of  
233 siRNAs generated the same effect, one of them being a smart pool from Dharmacon  
234 designed to target specific region of interest, the down-regulation of *phkb* can be held as a  
235 specific consequence rather than a non-specific off target effect. Further, given the fact that  
236 splicing is predominantly co-transcriptional<sup>43-45</sup>, it is highly unlikely that siRNAs directed  
237 against Hmrhl would affect the primary transcript through the intron leading to its down-  
238 regulation. In fact the presence of RNA PolIII, transcription factors and active epigenetic  
239 marks at 5' end of Hmrhl strongly suggest it to be an independent transcript, rather than  
240 being spliced out of/ arising from the PHKB primary transcript/ intron. This fact is  
241 substantiated by our northern hybridization and primer walking experiments. Northern  
242 hybridization with Hmrhl specific probe detected a single transcript of ~5 kb and no larger

243 transcript of the size corresponding to the intron (30 kb) was recognized. Moreover, we  
244 reached ends of the Hmrhl transcript at 5523 bp itself during primer walking, confirming the  
245 fact that it is not a part of any larger, stable intron but rather an independent transcript.  
246 Therefore, we propose that the down-regulation of *phkb* upon knockdown of Hmrhl is  
247 related to regulation of *phkb* transcription by the Hmrhl enhancer RNA, rather than being  
248 mediated through the intron or the primary transcript.

249 The human *phkb* gene is located on the chromosome 16: 47,461,123-47,701,523 (240kb,  
250 GRCh38) at 16q12.1 cytogenetic region, on the forward strand. It is involved in the  
251 breakdown of glycogen to produce glucose. An up-regulation of *phkb* gene to produce  
252 more glucose is arguably beneficial for the cancer cells in order to sustain their increased  
253 metabolic rate and proliferation. It has indeed been reported recently that *phkb* gene  
254 promotes glycogen breakdown and aids cancer cell survival<sup>46</sup>. In fact PHKB shows  
255 medium to high levels of expression in several blood cancers as shown in cell line atlas  
256 data, with highest level of expression seen in K562 (supplementary Fig. S5).

257 The primary cause of chronic myelogenous leukemia is a translocation between  
258 chromosomes 9 and 22, which generates the shortened chromosome 22 known as  
259 Philadelphia chromosome<sup>47</sup>. This translocation creates a fusion oncogene, BCR-ABL,  
260 which codes for a constitutively active Tyrosine Kinase protein. This protein in turn  
261 activates a cascade of genes involved in cell cycle and inhibits those involved in DNA  
262 repair, thus leading to an uncontrolled growth of CML cells with an accumulation of  
263 secondary mutations<sup>47</sup>. Corroborating this, a very recent study by Zhou et al (2018)<sup>48</sup> has  
264 revealed a catalogue of sequence, structural and copy number variations in K562 genome.  
265 They show that K562 genome is near triploid in nature, shows insertion of several novel  
266 LINE and Alu elements, multiple chromosomal translocations including the hallmark BCR/

267 ABL translocation, and an array of indels, SNPs and other mutations. Further, genome wide  
268 association studies (GWAS) show that more than 90% of the disease associated SNPs fall in  
269 the noncoding portions of the genome and that many SNPs fall within or very close to  
270 enhancers<sup>10,49</sup>. Cavalli et al (2016)<sup>50</sup> sequenced a number of ENCODE cell lines and showed  
271 that highest number of the allele specific, disease associated SNPs were detected in K562.  
272 Previous studies have also revealed that cancer cells acquire de novo enhancers at driver  
273 genes. For example, Hnisz et al (2013)<sup>10</sup> identified super enhancers associated with key  
274 oncogenes in 18 different cancers with the help of ChIP-seq for H3K27Ac mark. The gene  
275 desert region around the Myc oncogene acquires H3K27Ac enhancer mark in colorectal  
276 cancer, pancreatic cancer and T-cell leukemia, which is absent in the healthy individuals<sup>10</sup>.  
277 In view of all the above observations, we propose that Hmrhl locus has gained an  
278 enhancer/ super enhancer function in the K562 cells either due to change/s in the primary  
279 sequence or due to a change in the activity/ availability of factors like enzymes,  
280 transcription factors, looping factors etc., or due to a combination of many such events.

281 Our luciferase reporter assay revealed that insert 3 (1.5kb), which included both the -1KB  
282 upstream sequence as well as the +500bp downstream sequence of Hmrhl start site produced  
283 a very strong signal with the enhancer vector as compared to the other two inserts. In fact, of  
284 the two H3K27Ac peaks formed at the 5' region of Hmrhl, one is downstream of the  
285 transcription start site of Hmrhl while the other is upstream of it. Interestingly, when we  
286 analysed -1kb Hmrhl upstream sequence, it was revealed that they possess sequences very  
287 similar to the core sequence of viral enhancers namely AAAACCAC and  
288 GTGGTTTGAA<sup>51</sup> (Fig. S6). These viral enhancers are precisely conserved in the mouse as  
289 well as human immunoglobulin heavy chain gene enhancers<sup>52-55</sup>. Not only the B cells, even  
290 the T cells and haematopoietic cells in general, have specific viral enhancers which are  
291 located within introns<sup>56-58</sup>. Several viruses including the polyoma virus and the Molony

292 murine leukemia virus (MoMLV) possess these enhancer elements and any mutations in the  
293 core sequence, 'AAAACCAC', have been shown to cause increased incidence of erythro  
294 leukemias<sup>59-61</sup>. A group of mammalian transcription factors involved in haematopoiesis  
295 called Core Binding Factor (CBF), binds to the core site of many retroviral enhancer  
296 elements and also to the enhancers of T-cell receptor genes<sup>62-63</sup>. One of the subunits of CBF,  
297 CBF- $\alpha$ , also known as AML1 (Acute Myeloid Leukemia 1), is known to be rearranged by  
298 chromosomal translocations in myeloproliferative diseases and mutations in core AML1  
299 sites in murine leukemia viruses are known to affect their disease specificity and latency<sup>59, 62,</sup>  
300 <sup>64-66</sup>. In all probability, the viral enhancer elements in the immediate upstream region of  
301 Hmrhl seem to play a critical role in conferring the enhancer properties to Hmrhl in K562  
302 erythro-leukemia cells. In essence the viral enhancers could mediate the enhancer evolution  
303 in the human genome. Though our analysis of the Hmrhl locus and its 1kb upstream region  
304 did not reveal any variations in the sequence, it may be noted here that interrogating a  
305 complex cancer genome like that of K562 is not a simple task by any means. Since K562  
306 genome is triploid in nature and bears multiple mutations, we advocate that a blend of  
307 different genetic/ epigenetic alterations could have rendered the enhancer properties to the  
308 Hmrhl locus.

309 The *phkb* gene appears to share the promoter with its upstream gene, ITFG1, but it remains  
310 to be seen if Hmrhl has a role in regulating ITFG1 gene as well, in leukemia.

311 Sequence conservation of noncoding regions is suggested to indicate the occurrence of  
312 enhancers<sup>67</sup>. In this context, it may be noted that both Mrhl and Hmrhl are transcribed from  
313 the introns of *phkb* gene and show significant sequence conservation from mouse to human  
314 as seen in current studies. The fact that even the mouse counterpart, Mrhl exhibits the  
315 enhancer marks, H3K4Me1 and HeK27Ac in the mouse erythro-leukemia cells (MEL cell

316 line, mouse Encode database, Supplementary Fig.S7), strongly suggests a functional  
317 conservation of these two homologs, especially under leukemic conditions. Intronic  
318 enhancers/ eRNAs have been reported in case of several other genes as well <sup>39,68-69</sup>. The  
319 eRNAs are known to be unstable and low in abundance<sup>38-39</sup>, possibly due to which they  
320 were not easily detected in earlier days, in the absence of high throughput techniques like  
321 RNA sequencing.

322 With respect to the mouse *Mrhl* function, our earlier studies in the mouse spermatogonial  
323 cell line, GC1-SPG had revealed that *Mrhl* down-regulation brings about the activation of  
324 Wnt signalling but does not affect its parent gene, *phkb*<sup>19</sup>. It was further reported that *Mrhl*  
325 gets down-regulated in response to induced activation of Wnt signalling<sup>20</sup>. It may be noted  
326 here that a human spermatogonial cell line is not available wherein the functions of *Mrhl*  
327 and *Hmrhl* could be aptly compared, with respect to the Wnt signalling regulation function.  
328 As far as the K562 cell line is concerned, *Hmrhl* is well expressed in these cancer cells  
329 despite the active Wnt signalling, rather than being downregulated, unlike what has been  
330 reported for its mouse counterpart in the GC1 cells<sup>20</sup>. We did not observe a translocation of  $\beta$ -  
331 catenin to the nucleus under conditions of *Hmrhl* downregulation in Hek293T cells either  
332 (Fig.S8). Even in case of mouse embryonic stem cells also, Wnt signalling regulation by  
333 *Mrhl* has not been observed (Pal et al, unpublished). These studies show that regulation of  
334 Wnt signalling by the *Mrhl* RNA is not a global phenomenon but it could be exclusive to the  
335 mouse spermatogonial cells. It may perform a completely different task in another cell type  
336 or in another cellular context, which appears to be the case with regard to the erythro  
337 leukemia cells.

338 Enhancers are regulatory elements that ensure tissue and developmental stage specific  
339 expression of genes, since all genes exist in all tissues, throughout development, but express  
340 only when/ where the enhancer is active. As mentioned earlier, genome wide association

341 studies have revealed that enhancers are the prime targets for genetic and epigenetic  
342 changes that support cancer initiation and tumor progression. Mutations in enhancers or  
343 gain of super enhancers have been reported to favour cancer development in a number of  
344 cases<sup>8,70-72</sup>. A recent report by Corces Zimmerman et al (2014)<sup>73</sup> describes super enhancers  
345 specifically in a group of AML patients. The targets of these super enhancers involve not only  
346 the key driver genes of AML but also genes encoding protein kinases and chromatin  
347 regulators, providing insights into the significance of super enhancers in the context of  
348 cancer.

349 Understanding related to enhancers and their mechanism of action is expected to advance  
350 diagnosis and therapeutic strategies for cancer and other diseases linked to altered enhancer  
351 function. Enhancer RNAs can serve as valuable biomarkers for various diseases and the  
352 expression of the causal genes can be manipulated through RNA interference mediated gene  
353 silencing for a promising remedy.

## 354 **Materials and Methods**

### 355 **Cell lines and reagents**

356 K562 (Chronic Myelogenous Leukemia/ Erythro Leukemia) cell line was obtained from  
357 NCCS Pune (India) and cultured in RPMI medium (Gibco), Hek293T cells were obtained  
358 from the American Type Culture Collection (ATCC, CRL-1573) and were cultured in  
359 Dulbecco's modified Eagle's medium (Sigma); both were supplemented with 10% fetal  
360 bovine serum (Invitrogen); and 100 units/ml penicillin-streptomycin solution (Sigma) at  
361 37°C in a humidified chamber with 5% CO<sub>2</sub>. All fine chemicals were purchased from Sigma  
362 Aldrich and Life Technologies unless otherwise specified.

### 363 **Genomic DNA; RNA isolation, Reverse Transcription and Real Time quantitative PCR**

364 Genomic DNA was extracted from K562/ Hek293T cells and used as a template for PCR  
365 reactions. The sequence for the PHKB intron 14 was obtained from the ENSEMBLE  
366 genome browser. Various primer pairs specific for Hmrhl, Actin, Phkb were obtained from  
367 Sigma and used for PCR, cloning, sequencing etc. (Table S 1). Total RNA was isolated from  
368 cultured cells with the help of TRIzol reagent (Sigma, USA), following manufacturer's  
369 instructions. ~2-3µg of total RNA was reverse transcribed with the help of oligo(dT)17  
370 primer and Super Script III/ Revertaid Reverse Transcriptase. 1/20<sup>th</sup> of the reverse  
371 transcription product was used for PCR reaction using gene specific primers. For real-time  
372 quantitative PCR (qPCR), the cDNA was diluted to 1:10, added to Sybr green mix (Bio-Rad)  
373 and gene specific primers and the reaction was carried out and analyzed in a Biorad Real  
374 Time Detection machine.

### 375 **Northern Hybridization**

376 The sequence in the central, unique region of Hmrhl from K562 genomic DNA was cloned  
377 in pGEM 3Z(+) vector. It was linearized with HindIII enzyme and antisense digoxigenin-  
378 labeled RNA probe were generated using DIG Northern Starter Kit (Roche) according to the  
379 manufacturer's instructions. 2µg of total RNA was loaded on a 2% agarose gel containing  
380 1% formaldehyde and run for 2-3hrs in MOPS buffer. Hybond-N+ membrane (Amersham  
381 Bioscience) was used to transfer the RNA on to the membrane through capillary transfer  
382 methods overnight. Hybridization was carried out with DIG labeled probe at 60 °C overnight.  
383 Next day detection was carried out and the membrane was developed according to the DIG  
384 Northern Starter Kit instructions (Roche).

### 385 **Chromatin immunoprecipitation (ChIP)**

386 K562 cells (10<sup>6</sup>) were fixed in 1% formaldehyde (sigma) for 10 min at RT followed by  
387 quenching with 125 mM glycine for 5 min to stop the cross-linking reaction. After washing



388 with PBS containing Protease Inhibitor Cocktail (Roche) twice, cells were spun down and  
389 washed with buffer A (20mM HEPES-KOH, pH7.5, 10mM EDTA pH 8.0, 0.5mMEGTA,  
390 0.25% TritonX-100), buffer B (50mM HEPES-KOH, pH7.5, 150mM NaCl, 1mMEDTA pH  
391 8.0, 0.5mMEGTA) for 5-10 min at 4<sup>0</sup> C and resuspended in buffer C (20mM HEPES-KOH,  
392 pH7.5, 1mM EDTA pH 8.0, 0.5mMEGTA, 0.1% SDS and protease inhibitor Cocktail) and  
393 allow to sit on ice for 10 min. Samples were sonicated at high intensity with 40 sec on/off  
394 cycles in a Bioruptor sonicator (Diagenode) to get fragments in the range of 400-600bp. De-  
395 crosslinking was done by adding ProtK and RNase. Samples were diluted 1:5 in IP dilution  
396 buffer (20mM Tris pH7.4, 10mM NaCl, 3mM MgCl<sub>2</sub>, 1mM CaCl<sub>2</sub>, 4% NP-40, 1mM PMSF  
397 and protease inhibitor). Samples were precleared by binding with 50 µl of protein A beads.  
398 An aliquot (50 µl) of soluble chromatin was kept as input. Samples were immunoprecipitated  
399 either with the required antibodies (Ab4729 and Ab8895, Abcam) or the pre immune serum  
400 as control, O/N at 4°C. Next day 50 µl of protein A beads (Invitrogen) were added to the  
401 immune-complex and incubated at 4°C for 2 hrs. Beads were washed 2-3 times sequentially  
402 with ChIP wash buffer I (20mM Tris-cl, pH 7.4, 20mM EDTA, 1% Troton X 100, 150mM  
403 NaCl, 1mM PMSF), II (20mM Tris-cl, pH 7.4, 2mM EDTA, 1% Troton X 100, 0.1% SDS,  
404 500mM NaCl, 1mM PMSF), and III (10mM Tris-cl, 1mM EDTA, 0.25mM LiCl, 0.5%  
405 NP40, 0.5% Sodium deoxy Cholate), then washed with TE and finally chromatin was eluted  
406 in 400 µlof elution buffer (25mM Tris-Cl, 10mM EDTA, 0.5% SDS, incubated at 65<sup>0</sup>C for 30  
407 min), DNA was isolated using Promega kit and subjected to qPCR.

#### 408 **Transfection and Luciferase assay**

409 Clones for luciferase assay were made from K562 genomic DNA using the sequences in the  
410 5' end of Hmrhl. The inserts were cloned in pGL4.10 (Promoter Vector), pGL4.23  
411 (Enhancer Vector, Promega) between HindIII and KpnI sites, upstream of the luciferase  
412 gene. The clones were confirmed by sequencing. Primers used are listed in table S1. K562

413 cells were transfected with the above mentioned clones using lipofectamine reagent. Cells  
414 were grown in RPMI supplemented with 10% FBS till they reached confluence (~10<sup>6</sup> cells  
415 in a T25 flask) at which point they were harvested and re-suspended in 1ml of serum  
416 free, antibiotic free medium and distributed equally in a 6 well plate which contained  
417 medium with 7% FBS. 1µg/ml DNA (clone) was used along with double the amount (v/v)  
418 of lipofectamine reagent as transfection solution, which was replaced after 24hours with  
419 complete medium and the cells were grown for another day. Cells were harvested after 48  
420 hrs, lysed in 1X reporter lysis buffer for 30 min on ice and transferred to microfuge tubes.  
421 Supernatant was collected to which substrate for luciferase was added and readings were  
422 recorded in a luminometer.

#### 423 **siRNA mediated down-regulation of Hmrhl**

424 Four different siRNAs, mapping to the unique, conserved region of Hmrhl were purchased  
425 from Sigma 1. 5'-ccaguuacagcaaguacuu-3'; 5'-aaguacuugcuguaacugg-3' 2. 5'-  
426 cauguugcugcuuugguu-3'; 5'-aagccaaagcagcaacaug-3' 3. 5'-gugacaaagcguucgguau-3';  
427 5'auaccgaacgcuuugucac-3' 4. 5'-cuaauccaauauauaaa-3'; 3'-uauuuauauauuggauuag-3'. A  
428 pool of these siRNAs was used for down regulation experiments. K562 cells/ Hek293T cells  
429 were transfected with 100nm siRNA per 1.5 ml of the medium (7% FBS), with lipofectamine  
430 2000 reagent in a 6 well plate as described above. Medium was replaced with complete  
431 medium (10% FBS) after 24 hrs. Cells were harvested after 48 hrs and RNA isolated and  
432 scored for Hmrhl, PHKB, Actin by qPCR. Scrambled siRNA was used for control. Another  
433 pool of siRNAs from Dharmacon (Table 1) was also used to down regulate Hmrhl and the  
434 effect was examined in both K562 and GM12878 cell lines.

#### 435 **Immunostaining**

436 Hek293T cells grown on coverslips were fixed for 20 min in 4% paraformaldehyde in PBS,  
437 washed with PBS, permeabilized with 0.1% Triton X-100 for 15 min, and blocked with 1%  
438 bovine serum albumin (BSA) for 1h. Cells were incubated with primary antibody ( $\beta$ -catenin  
439 antibody, Abcam, 1:100 dilution in 0.1% BSA) at room temperature for 45 min followed by  
440 three washes with 0.1% PBST (PBS + 0.1% Tween 20) and incubation with Alexa Flour  
441 488 secondary antibody (1:400 dilution in 0.1% BSA) for 45 min at room temperature,  
442 washed thrice with 0.1% PBST, stained with 1  $\mu$ g/ml DAPI (4,6- diamidino- 2-  
443 phenylindole), washed and mounted in Dabco (Sigma). Images were acquired in an LSM  
444 510 Meta confocal microscope (Zeiss) and analysed by image analysis software  
445 provided by Carl Zeiss.

#### 446 **Coding Potential and evolutionary conservation analysis**

447 Coding potential of Hmrhl was evaluated with NCBI-ORF finder and CPAT showing the  
448 coding probability of  $\sim 0.99$  due to the presence of 1510 bp-long ORF, partially similar (31.1  
449 % similarity in end-to-end global alignment) to the LINE1 ORF2 sequence. To confirm the  
450 plausible coding potential of Hmrhl carrying the sequence similar to LINE1-ORF2,  
451 PhyloCSF (Phylogenetic Codon Substitution Frequencies) was run showing and strongly  
452 advocating that no approximate coding regions or novel coding regions are present.  
453 The evolutionary protein-coding potential as determined by Broad Institute's PhyloCSF data  
454 was visualized in UCSC Genome Browser. Furthermore, the absence of Kozak Sequence near  
455 the ORF present on HMrhl was confirmed using the online tool "A program for identifying  
456 the initiation codons in cDNA sequences".

457 For the phylogenetic tree, regions similar to Hmrhl region across 23 species were identified  
458 using Ensembl comparative region analysis and the sequences extracted accordingly for each  
459 species from Ensembl were used for Multiple Sequence Alignment (MSA) using Clustal

460 Omega leading to the generation of UPGMA tree data in Newick format which was applied  
461 for the construction of circular tree in iTOL (Interactive Tree of Life).

462 For the histone marks at Hmrhl locus, raw data for Histone marks (H3K27ac, H3K4me1, and  
463 H3k4me3) was downloaded from UCSC genome browser. After quality processing, FastQ  
464 files were aligned against human hg19 genome assembly using TopHat and aligned BAM  
465 files were sorted and further used for visualization in IGV Genome Browser.

## 466 **References**

- 467 1. Dunham I, Kundaje A, Aldred SF, et al. ENCODE Project Consortium. An integrated  
468 encyclopedia of DNA elements in the human genome. *Nature*. 2012; 489:57–74.
- 469 2. Mercer TR, Dinger ME, Mattick JS. Long non-coding RNAs: insights into functions.  
470 *Nature reviews genetics*. 2009;10(3):155.
- 471 3. Nagano T, Fraser P. No-nonsense functions for long noncoding RNAs. *Cell*. 2011  
472 15;145(2):178-81.
- 473 4. Blackwood EM, Kadonaga JT. Going the distance: a current view of enhancer action.  
474 *Science*. 1998;281(5373):60-3.
- 475 5. Heintzman ND, Hon GC, Hawkins RD, Kheradpour P, Stark A, Harp LF, Ye Z, Lee LK,  
476 Stuart RK, Ching CW, Ching KA. Histone modifications at human enhancers reflect global  
477 cell-type-specific gene expression. *Nature*. 2009;459(7243):108-12.
- 478 6. Thurman RE, Rynes E, Humbert R, Vierstra J, Maurano MT, Haugen E, Sheffield NC,  
479 Stergachis AB, Wang H, Vernot B, Garg K. The accessible chromatin landscape of the  
480 human genome. *Nature*. 2012;489(7414):75-82.
- 481 7. Sakabe NJ, Savic D, Nobrega MA. Transcriptional enhancers in development and disease.  
482 *Genome biology*. 2012;13(1):238.
- 483 8. Lovén J, Hoke HA, Lin CY, Lau A, Orlando DA, Vakoc CR, Bradner JE, Lee TI, Young  
484 RA. Selective inhibition of tumor oncogenes by disruption of super-enhancers. *Cell*.  
485 2013;153(2):320-34.
- 486 9. Whyte WA, Orlando DA, Hnisz D, Abraham BJ, Lin CY, Kagey MH, Rahl PB, Lee TI,  
487 Young RA. Master transcription factors and mediator establish super-enhancers at key cell  
488 identity genes. *Cell*. 2013;153(2):307-19.
- 489 10. Hnisz D, Abraham BJ, Lee TI, Lau A, Saint-André V, Sigova AA, Hoke HA, Young RA.  
490 Super-enhancers in the control of cell identity and disease. *Cell*. 2013;155(4):934-47.

- 491 11. Kim TK, Hemberg M, Gray JM, Costa AM, Bear DM, Wu J, Harmin DA, Laptewicz M,  
492 Barbara-Haley K, Kuersten S, Markenscoff-Papadimitriou E. Widespread transcription at  
493 neuronal activity-regulated enhancers. *Nature*. 2010;465(7295):182-7.
- 494 12. Ørom UA, Derrien T, Beringer M, Gumireddy K, Gardini A, Bussotti G, Lai F, Zytnicki  
495 M, Notredame C, Huang Q, Guigo R. Long noncoding RNAs with enhancer-like function in  
496 human cells. *Cell*. 2010;143(1):46-58.
- 497 13. Mousavi K, Zare H, Dell'Orso S, Grontved L, Gutierrez-Cruz G, Derfoul A, Hager GL,  
498 Sartorelli V. eRNAs promote transcription by establishing chromatin accessibility at defined  
499 genomic loci. *Molecular cell*. 2013;51(5):606-17.
- 500 14. Lam MT, Li W, Rosenfeld MG, Glass CK. Enhancer RNAs and regulated transcriptional  
501 programs. *Trends in biochemical sciences*. 2014;39(4):170-82.
- 502 15. Xiang JF, Yin QF, Chen T, Zhang Y, Zhang XO, Wu Z, Zhang S, Wang HB, Ge J, Lu X,  
503 Yang L. Human colorectal cancer-specific CCAT1-L lncRNA regulates long-range chromatin  
504 interactions at the MYC locus. *Cell research*. 2014;24(5):513-31.
- 505 16. Kim T, Cui R, Jeon YJ, Lee JH, Lee JH, Sim H, Park JK, Fadda P, Tili E, Nakanishi H,  
506 Huh MI. Long-range interaction and correlation between MYC enhancer and oncogenic long  
507 noncoding RNA CARLo-5. *Proceedings of the National Academy of Sciences*. 2014;  
508 111(11):4173-8.
- 509 17. Nishant KT, Ravishankar H, Rao MR. Characterization of a mouse recombination hot  
510 spot locus encoding a novel non-protein-coding RNA. *Molecular and cellular biology*.  
511 2004;24(12):5620-34.
- 512 18. Ganesan G, Rao SM. A novel noncoding RNA processed by Drosha is restricted to  
513 nucleus in mouse. *RNA*. 2008;14(7):1399-410.
- 514 19. Arun G, Akhade VS, Donakonda S, Rao MR. mrhl RNA, a long noncoding RNA,  
515 negatively regulates Wnt signaling through its protein partner Ddx5/p68 in mouse  
516 spermatogonial cells. *Molecular and cellular biology*. 2012;32(15):3140-52.
- 517 20. Akhade VS, Dighe SN, Kataruka S, Rao MR. Mechanism of Wnt signaling induced down  
518 regulation of mrhl long non-coding RNA in mouse spermatogonial cells. *Nucleic acids  
519 research*. 2016;44(1):387-401.
- 520 21. Akhade VS, Arun G, Donakonda S, Satyanarayana Rao MR. Genome wide chromatin  
521 occupancy of mrhl RNA and its role in gene regulation in mouse spermatogonial cells. *RNA  
522 biology*. 2014;11(10):1262-79.
- 523 22. Kataruka S, Akhade VS, Kayyar B, Rao MR. Mrhl lncRNA mediates meiotic  
524 commitment of mouse spermatogonial cells by regulating Sox8 expression. *Molecular and  
525 Cellular Biology*. 2017;MCB-00632.

- 526 23. Look AT. Oncogenic transcription factors in the human acute leukemias. *Science*.  
527 1997;278(5340):1059-64.
- 528 24. Darnell JE. Transcription factors as targets for cancer therapy. *Nature Reviews Cancer*.  
529 2002;2(10):740-9.
- 530 25. Garraway LA, Lander ES. Lessons from the cancer genome. *Cell*. 2013;153(1):17-37.
- 531 26. Panne D. The enhanceosome. *Current opinion in structural biology*. 2008;18(2):236-42.
- 532 27. Lelli KM, Slattery M, Mann RS. Disentangling the many layers of eukaryotic  
533 transcriptional regulation. *Annual review of genetics*. 2012;46:43-68.
- 534 28. Ong CT, Corces VG. Enhancer function: new insights into the regulation of tissue-  
535 specific gene expression. *Nature Reviews Genetics*. 2011;12(4):283-93.
- 536 29. Spitz F, Furlong EE. Transcription factors: from enhancer binding to developmental  
537 control. *Nature Reviews Genetics*. 2012;13(9):613-26.
- 538 30. Krivega I, Dean A. Enhancer and promoter interactions—long distance calls. *Current*  
539 *opinion in genetics & development*. 2012;22(2):79-85.
- 540 31. Lee TI, Young RA. Transcriptional regulation and its misregulation in disease. *Cell*.  
541 2013;152(6):1237-51.
- 542 32. Goodman RH, Smolik S. CBP/p300 in cell growth, transformation, and development.  
543 *Genes & development*. 2000;14(13):1553-77.
- 544 33. Visel A, Blow MJ, Li Z, Zhang T, Akiyama JA, Holt A, Plajzer-Frick I, Shoukry M,  
545 Wright C, Chen F, Afzal V. ChIP-seq accurately predicts tissue-specific activity of enhancers.  
546 *Nature*. 2009;457(7231):854-8.
- 547 34. Tuan D, Kong S, Hu K. Transcription of the hypersensitive site HS2 enhancer in erythroid  
548 cells. *Proceedings of the National Academy of Sciences*. 1992;89(23):11219-23.
- 549 35. Hah N, Murakami S, Nagari A, Danko CG, Kraus WL. Enhancer transcripts mark active  
550 estrogen receptor binding sites. *Genome research*. 2013 May 1.
- 551 36. Darrow EM, Chadwick BP. Boosting transcription by transcription: enhancer-associated  
552 transcripts. *Chromosome research*. 2013;21(6-7):713-24.
- 553 37. Lai F, Shiekhattar R. Enhancer RNAs: the new molecules of transcription. *Current*  
554 *opinion in genetics & development*. 2014;25:38-42.
- 555 38. Kim TK, Hemberg M, Gray JM. Enhancer RNAs: a class of long noncoding RNAs  
556 synthesized at enhancers. *Cold Spring Harbor perspectives in biology*. 2015;7(1):a018622.
- 557 39. Li W, Notani D, Rosenfeld MG. Enhancers as non-coding RNA transcription units: recent  
558 insights and future perspectives. *Nature Reviews Genetics*. 2016;17(4):207-23.

- 559 40. Chen H, Du G, Song X, Li L. Non-coding transcripts from enhancers: new insights into  
560 enhancer activity and gene expression regulation. *Genomics, proteomics & bioinformatics*.  
561 2017 Jun 30;15(3):201-7.
- 562 41. Boivin V, Deschamps-Francoeur G, Scott MS. Protein coding genes as hosts for  
563 noncoding RNA expression. In *Seminars in cell & developmental biology 2017*. Academic  
564 Press.
- 565 42. Fatima R, Akhade VS, Pal D, Rao SM. Long noncoding RNAs in development and  
566 cancer: potential biomarkers and therapeutic targets. *Molecular and cellular therapies*.  
567 2015;3(1):5.
- 568 43. Tilgner H, Knowles DG, Johnson R, Davis CA, Chakraborty S, Djebali S, Curado J,  
569 Snyder M, Gingeras TR, Guigó R. Deep sequencing of subcellular RNA fractions shows  
570 splicing to be predominantly co-transcriptional in the human genome but inefficient for  
571 lncRNAs. *Genome research*. 2012; 22(9):1616-25.
- 572 44. Oesterreich FC, Herzel L, Straube K, Hujer K, Howard J, Neugebauer KM. Splicing of  
573 nascent RNA coincides with intron exit from RNA polymerase II. *Cell*. 2016; 7;165(2):372-  
574 81.
- 575 45. Wallace EW, Beggs JD. Extremely fast and incredibly close: co-transcriptional splicing in  
576 budding yeast. *Rna*. 2017:rna-060830.
- 577 46. Terashima M, Fujita Y, Togashi Y, Sakai K, De Velasco MA, Tomida S, Nishio K.  
578 KIAA1199 interacts with glycogen phosphorylase kinase  $\beta$ -subunit (PHKB) to promote  
579 glycogen breakdown and cancer cell survival. *Oncotarget*. 2014;5(16):7040.
- 580 47. Hehlmann R, Hochhaus A, Baccarani M. Chronic myeloid leukaemia. *The Lancet*.  
581 2007;370(9584):342-50.
- 582 48. Zhou B, Ho S. S, X. Zhu, X. Zhang, N. Spies, S. Byeon, J. G. Arthur, R. Pattni, N. Ben-  
583 Efraim, M. S. Haney, et al., “Comprehensive, integrated and phased whole-genome analysis  
584 of the primary encode cell line k562,” bioRxiv, p. 192344, 2018.
- 585 49. Maurano MT, Humbert R, Rynes E, Thurman RE, Haugen E, Wang H, Reynolds AP,  
586 Sandstrom R, Qu H, Brody J, Shafer A. Systematic localization of common disease-  
587 associated variation in regulatory DNA. *Science*. 2012;337(6099):1190-5.
- 588 50. Cavalli M, Pan G, Nord H, Wallerman O, Arzt EW, Berggren O, Elvers I, Eloranta ML,  
589 Rönnblom L, Toh KL, Wadelius C. Allele-specific transcription factor binding to common  
590 and rare variants associated with disease and gene expression. *Human genetics*. 2016  
591 1;135(5):485-97.
- 592 51. Maeda H, Araki K, Kitamura D, Wang J, Watanabe T. Nuclear factors binding to the  
593 human immunoglobulin heavy-chain gene enhancer. *Nucleic acids research*. 1987;  
594 15(7):2851-69.

- 595 52. Banerji J, Rusconi S, Schaffner W. Expression of a  $\beta$ -globin gene is enhanced by remote  
596 SV40 DNA sequences. *Cell*. 1981;27(2):299-308.
- 597 53. de Villiers J, Schaffner W. A small segment of polyoma virus DNA enhances the  
598 expression of a cloned  $\beta$ -globin gene over a distance of 1400 base pairs. *Nucleic acids*  
599 *research*. 1981;9(23):6251-64.
- 600 54. Levinson B, Khoury G, Woude GV, Gruss P. Activation of SV40 genome by 72-base pair  
601 tandem repeats of Moloney sarcoma virus. *Nature*. 1982;295(5850):568-72.
- 602 55. Gillies SD, Morrison SL, Oi VT, Tonegawa S. A tissue-specific transcription enhancer  
603 element is located in the major intron of a rearranged immunoglobulin heavy chain gene.  
604 *Cell*. 1983;33(3):717-28.
- 605 56. Mosthaf L, Pawlita M, Gruss P. A viral enhancer element specifically active in human  
606 haematopoietic cells. *Nature*. 1985;315(6020):597-600.
- 607 57. Bories JC, Loiseau P, d'Auriol L, Gontier C, Bensussan A, Degos L, Sigaux F. Regulation  
608 of transcription of the human T cell antigen receptor delta chain gene. A T lineage-specific  
609 enhancer element is located in the J delta 3-C delta intron. *Journal of Experimental Medicine*.  
610 1990;171(1):75-83.
- 611 58. Hambor JE, Mennone J, Coon ME, Hanke JH, Kavathas P. Identification and  
612 characterization of an Alu-containing, T-cell-specific enhancer located in the last intron of the  
613 human CD8 alpha gene. *Molecular and Cellular Biology*. 1993;13(11):7056-70.
- 614 59. Speck NA, Renjifo B, Golemis E, Fredrickson TN, Hartley JW, Hopkins N. Mutation of  
615 the core or adjacent LVb elements of the Moloney murine leukemia virus enhancer alters  
616 disease specificity. *Genes & development*. 1990;4(2):233-42.
- 617 60. Hallberg B, Schmidt J, Luz A, Pedersen FS, Grundström T. SL3-3 enhancer factor 1  
618 transcriptional activators are required for tumor formation by SL3-3 murine leukemia virus.  
619 *Journal of virology*. 1991;65(8):4177-81.
- 620 61. Hsiang YH, Spencer D, Wang S, Speck NA, Raulet DH. The role of viral enhancer "core"  
621 motif-related sequences in regulating T cell receptor-gamma and-delta gene expression. *The*  
622 *Journal of Immunology*. 1993;150(9):3905-16.
- 623 62. Zaiman AL, Lewis AF, Crute BE, Speck NA, Lenz J. Transcriptional activity of core  
624 binding factor-alpha (AML1) and beta subunits on murine leukemia virus enhancer cores.  
625 *Journal of virology*. 1995;69(5):2898-906.
- 626 63. Sangle NA, Perkins SL. Core-binding factor acute myeloid leukemia. *Archives of*  
627 *pathology & laboratory medicine*. 2011;135(11):1504-9.
- 628 64. Lewis AF, Stacy T, Green WR, Taddesse-Heath L, Hartley JW, Speck NA. Core-binding  
629 factor influences the disease specificity of Moloney murine leukemia virus. *Journal of*  
630 *virology*. 1999;73(7):5535-47.



- 631 65. Hart SM, Foroni L. Core binding factor genes and human leukemia. *Haematologica*.  
632 2002;87(12):1307-23.
- 633 66. Sørensen, K.D., Quintanilla-Martinez, L., Kunder, S., Schmidt, J. and Pedersen, F.S.,  
634 2004. Mutation of all Runx (AML1/core) sites in the enhancer of T-lymphomagenic SL3-3  
635 murine leukemia virus unmasks a significant potential for myeloid leukemia induction and  
636 favors enhancer evolution toward induction of other disease patterns. *Journal of*  
637 *virology*, 78(23),13216-13231.
- 638 67. Visel A, Minovitsky S, Dubchak I, Pennacchio LA. VISTA Enhancer Browser—a  
639 database of tissue-specific human enhancers. *Nucleic acids research*. 2006;35(suppl\_1):D88-  
640 92.
- 641 68. Ott, C.J., Blackledge, N.P., Kerschner, J.L., Leir, S.H., Crawford, G.E., Cotton, C.U. and  
642 Harris, A., 2009. Intronic enhancers coordinate epithelial-specific looping of the active CFTR  
643 locus. *Proceedings of the National Academy of Sciences*, 106(47),19934-19939.
- 644 69. Blattler, A., Berman, B.P., Nicolet, C.M., Witt, H., Yao, L., Farnham, P.J. and Guo, Y.,  
645 2014. Global loss of DNA methylation uncovers intronic enhancers in genes showing  
646 expression changes. *Genome biology*, 15(9), p.469.
- 647 70. Park SS, Kim JS, Tessarollo L, Owens JD, Peng L, Han SS, Chung ST, Torrey TA,  
648 Cheung WC, Polakiewicz RD, McNeil N. Insertion of c-Myc into Igh induces B-cell and  
649 plasma-cell neoplasms in mice. *Cancer research*. 2005 Feb 15;65(4):1306-15.
- 650 71. Chapuy B, McKeown MR, Lin CY, Monti S, Roemer MG, Qi J, Rahl PB, Sun HH, Yeda  
651 KT, Doench JG, Reichert E. Discovery and characterization of super-enhancer-associated  
652 dependencies in diffuse large B cell lymphoma. *Cancer cell*. 2013;24(6):777-90.
- 653 72. Kron KJ, Lupien M, Bailey SD. Enhancer alterations in cancer: a source for a cell identity  
654 crisis. *Genome medicine*. 2014;6(9):77.
- 655 73. Corces-Zimmerman MR, Eaton M, Lopez J, Ke N, Fritz C, Olson E, Majeti R, Loven J.  
656 Discovery and Characterization of Super-Enhancer-Associated Dependencies in Acute  
657 Myeloid Leukemia. *Blood*. 2014; 124:3539.

658

## 659 **Acknowledgments**

660 We thank Suma B. S. of confocal facility and Anitha G. of the sequencing facility at  
661 JNCASR. We thank members of M. R. S. Rao laboratory for suggestions. RF would like to  
662 thank Dr. Manjira Ghosh, for introduction to the ENCODE database.

## 663 **Author Contribution and disclosure of potential conflict of interest**

664 R.F. and M.R.S.R. designed the experiments, analysed the data and wrote the manuscript. R.  
665 F., S. R. C. and D. T. R. carried out the molecular and cell biological and experiments. R. F.  
666 analysed the ENCODE data. UB performed the bioinformatic analysis for phylogenetic tree,  
667 CPAT, PhyloCSF and histone marks. Authors declare no conflict of interest and no  
668 competing financial interests.

## 669 **Funding**

670 M. R. S. Rao thanks Department of Science and Technology, Government of India for J. C.  
671 Bose and SERB Distinguished Fellowships and this work was financially supported by  
672 Department of Biotechnology (DBT), Govt. of India (Grant # BT/01/COE/07/09). R. F.  
673 received financial support in the form of DBT-RAship and S. R. C. is supported by SERB-  
674 NPDF.

## 675 **Figure Legends**

### 676 **Fig.1. Blast Analysis of mouse Mrhl lncRNA identified the human homolog.**

677 **i.** Schematic representation of mouse chromosome 8 and the C3 cytogenetic region which  
678 harbours the *phkb* gene. Mrhl is transcribed from the intron 15 of mouse *phkb* gene (shown as  
679 a pale green bar). **ii.** Blast analysis of mouse Mrhl identified the homologous sequence in the  
680 human *phkb* gene. Sequence from the middle region to the 3'end of Mrhl showed high  
681 homology with its human counterpart, as indicated by the red bars (Blue arrow). **iii.** Schematic  
682 representation of Human chromosome 16 and the 16q12.1 cytogenetic region where the *phkb*  
683 gene is located. Hmrhl (shown in deep green color) is transcribed from the intron 14 of the  
684 human *phkb* gene. **iv-v.** Sequences in the human genome sharing homology with Mrhl  
685 (GrCh37). Note the stretches of 71% (iv) and 65% identities (v) of the query sequence, Mrhl,  
686 against the human *phkb* gene (only part of the sequence shown here).

687 **Fig.2. Expression and coding potential analysis of Hmrhl. a.** Quantitative real time PCR  
688 analysis of Hmrhl expression showed that it is expressed in all human tissues (Brain, Heart,  
689 Kidney, lung, liver, pancreas, spleen, thymus, small intestine, colon, skeletal muscle, testes,  
690 prostate, ovary, placenta, leukocyte, from left to right) examined. Lowest expression was  
691 found in skeletal muscle (SM) which was taken as control, the level of which was considered  
692 as 1 and all others were plotted in comparison to it. Highest expression was seen in  
693 spleen (spln) followed by pancreas (Pnc), testis (Tst) and other tissues. **b.** Northern  
694 blot detection of Hmrhl. Total RNA from HEK 293T and K562 cell lines were separated on a  
695 2% agarose gel and subsequently hybridized with DIG labelled Hmrhl specific riboprobe to  
696 detect the transcript (i). In parallel, methylene blue staining was used to determine the size of  
697 HMRHL, using 28S rRNA (5kb) and 18s rRNA (1.9 kb) as reference (ii). Note that the size  
698 of Hmrhl is similar to that of 28s rRNA, revealing that Hmrhl is about 5kb in size. **c.** Protein-  
699 coding potential as determined by Broad Institute's PhyloCSF data and visualized in UCSC  
700 Genome Browser, showing that Hmrhl has no coding potential. **d.** Circular phylogenetic tree  
701 built in iTOL (Interactive Tree of Life).

702 **Fig.3. Hmrhl is conserved in mammals and has gained several repeat elements in the**  
703 **primates.** Figure shows the conservation of Hmrhl across various organisms and the repeat  
704 elements present in this genomic interval (shown below the conservation tracks) in human, as  
705 visualized through the UCSC genome browser. Note the unique sequence in the middle of  
706 Hmrhl which is highly conserved across various organisms and is flanked by the repeat  
707 elements L2B, L2C, MIR, Charlie, AluY, L1PA3, AluSx which are present only in higher  
708 primates (see text for details).

709 **Fig4. Hmrhl locus exhibits hallmarks of enhancer. a.** ENCODE data visualized through  
710 Integrated Genome Viewer (IGV) for DNase hypersensitive sites, p300 binding, enhancer  
711 specific histone marks, H3K27Ac and H3K4Me1 and the promoter specific histone mark,

712 H3K4Me3 at the 5' end of Hmrhl, only in K562 but not in GM12878 cells. Note the two  
713 prominent peaks (red) for the enhancer mark H3K27Ac in K562. **b-c.** Chromatin  
714 immunoprecipitation with Ab4729 (anti-H3K27Ac antibody) and Ab8895 (anti-H4K4Me1  
715 antibody) in K562 cells. Note the enrichment of both the enhancer marks at the 5' end of  
716 Hmrhl in the IP fraction as compared to input/ PIS/ gene desert region (GD), that serves as a  
717 negative control.

718 **Fig.5. Hmrhl locus exhibits hallmarks of enhancer contd.. a.** Encode data shows the  
719 binding of various transcription and PolII at the 5' end of Hmrhl. We have retained the  
720 H3K27Ac peaks in this figure also for a reference. **b.** Schematic for chromatin interaction  
721 analysis (ChiaPET data) for Hmrhl. The large purple-black peak representing histone marks  
722 on the extreme left denotes the promoter of *phkb* gene while the small purple peak at the far  
723 right represents the 5' end of Hmrhl. ChiaPET data shows the interaction of Hmrhl locus with  
724 *phkb* promoter, as represented by two black boxes (blue arrows) connected by a black line in  
725 **b.** The Hmrhl locus is expanded below in **c**, showing that this locus has enhancer  
726 properties only in K562 cell line (orange-yellow color), but not in other cell lines like  
727 GM12878, HepG2 or hESC. Genomic segments are colour coded by ENCODE as denoted  
728 in **d**, with red colour signifying active promoter (*phkb* promoter at far left, black arrow in **b**)  
729 while orange colour represents active enhancer at Hmrhl locus at far right (red arrow in **b**).

730 **Fig.6. Hmrhl is differentially expressed in various cancers. a.** Expression of Hmrhl  
731 in various normal and cancer samples as observed by qPCR. Note that Hmrhl is  
732 highly upregulated in several lymphoma samples (bracket) in comparison to  
733 normal range (arrow). In fact, of all cancers, the highest levels of Hmrhl are seen  
734 in some of the lymphoma samples. **b-c.** qPCR analysis of Hmrhl and PHKB  
735 expression showing that both are over expressed in K562 leukemia conditions as  
736 compared to GM12878 normal lymphocytes.

737 **Fig.7. Hmrhl functions as enhancer RNA. a.** Lucifaerase assay showing the intense signal  
738 of reporter activity in K562 cells with insert 3 cloned in enhancer vector. Note the low level  
739 of luciferase signal obtained with insert 2 both with promoter and enhancer vectors. **b.**  
740 siRNA mediated down-regulation of Hmrhl causes down-regulation of PHKB in K562 cells  
741 treated with Hmrhl specific siRNA pool as compared to control cells without transfection  
742 and cells treated with scrambled siRNA as negative control. **c-d.** Smart pool siRNA  
743 (Dharmacon) were used against the Hmrhl region to downregulate Hmrhl and subsequently  
744 expression level of PHKB gene were checked by qPCR in both K562 and GM12878 cell  
745 lines. Scrambled siRNA was used as a negative control.

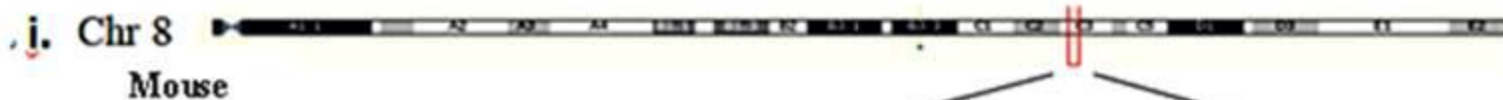

*phkb* (220.4 kb)

Intron 15

*mrhl* (2.4 kb)

ii. NCBI BLAST of Mrhl

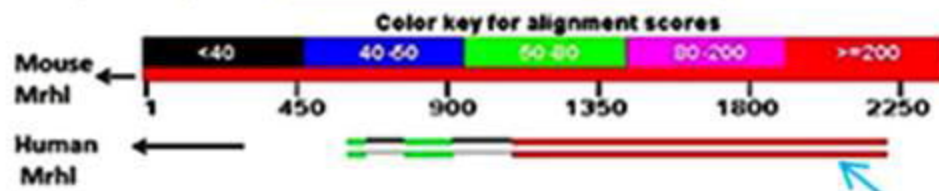

iii. Chr 16  
Human

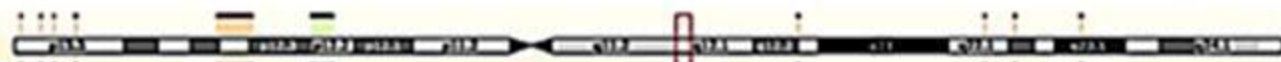

*phkb* (240.4 kb)

Intron 14

*Hmrhl* (5.5 kb)

iv.

| Range 3: 47660605 to 47660748                                                                                                         | GenBank  | Graphics                                                      | Next Match | Previous Match | First Match |
|---------------------------------------------------------------------------------------------------------------------------------------|----------|---------------------------------------------------------------|------------|----------------|-------------|
| Score                                                                                                                                 | Expect   | Identities                                                    | Gaps       | Strand         |             |
| 60.8 bits(66)                                                                                                                         | 1e-05    | 108/152(71%)                                                  | 13/152(8%) | Plus/Plus      |             |
| <b>Features:</b> phosphorylase_b_kinase_regulatory_subunit_beta_isoform_a<br>phosphorylase_b_kinase_regulatory_subunit_beta_isoform_b |          |                                                               |            |                |             |
| Query                                                                                                                                 | 774      | GCTATTTCCCATTTCTAGGTCCTCAGTTTCTTCATCCATCAAGTTGACTGCTGA-TTTATC | 832        |                |             |
|                                                                                                                                       |          |                                                               |            |                |             |
| Sbjct                                                                                                                                 | 47660605 | GCTATTTCCCTCTCTGGGCTCAGTCTTCTCATCCATCAAGTGA-TTATGATTTATC      | 47660663   |                |             |

v.

| Range 1: 47660946 to 47662155                                                                                                         | GenBank  | Graphics                                                     | Next Match    | Previous Match | First Match |
|---------------------------------------------------------------------------------------------------------------------------------------|----------|--------------------------------------------------------------|---------------|----------------|-------------|
| Score                                                                                                                                 | Expect   | Identities                                                   | Gaps          | Strand         |             |
| 203 bits(224)                                                                                                                         | 1e-48    | 798/1223(65%)                                                | 134/1223(10%) | Plus/Plus      |             |
| <b>Features:</b> phosphorylase_b_kinase_regulatory_subunit_beta_isoform_a<br>phosphorylase_b_kinase_regulatory_subunit_beta_isoform_b |          |                                                              |               |                |             |
| Query                                                                                                                                 | 1095     | TTACCATTAGAAATCTTTCTTTGGT-GTGACCCACAACATGAAGTCCTTTTACATGACAC | 1153          |                |             |
|                                                                                                                                       |          |                                                              |               |                |             |
| Sbjct                                                                                                                                 | 47660946 | TTACCACTAGGGACCTTTCTTTGCTTGTAACCCACCACCTGAGGTGTTTCTAAATGACCA | 47661005      |                |             |

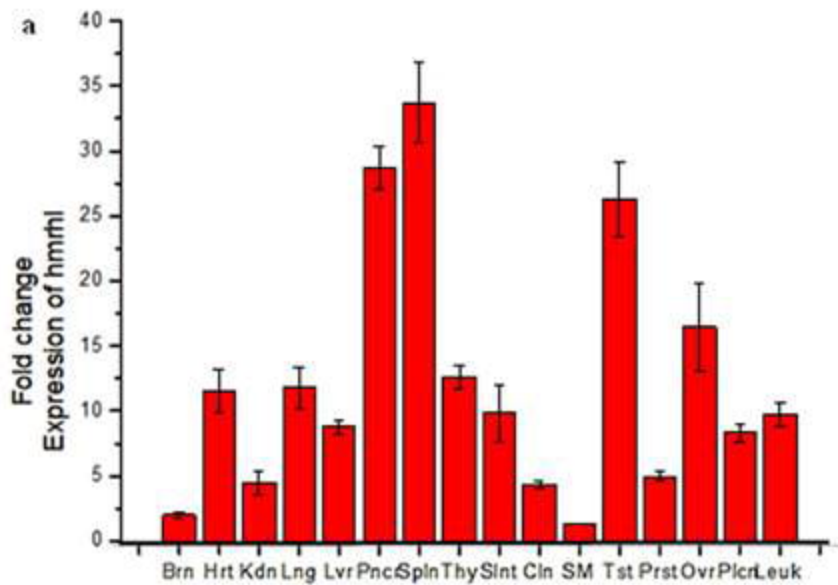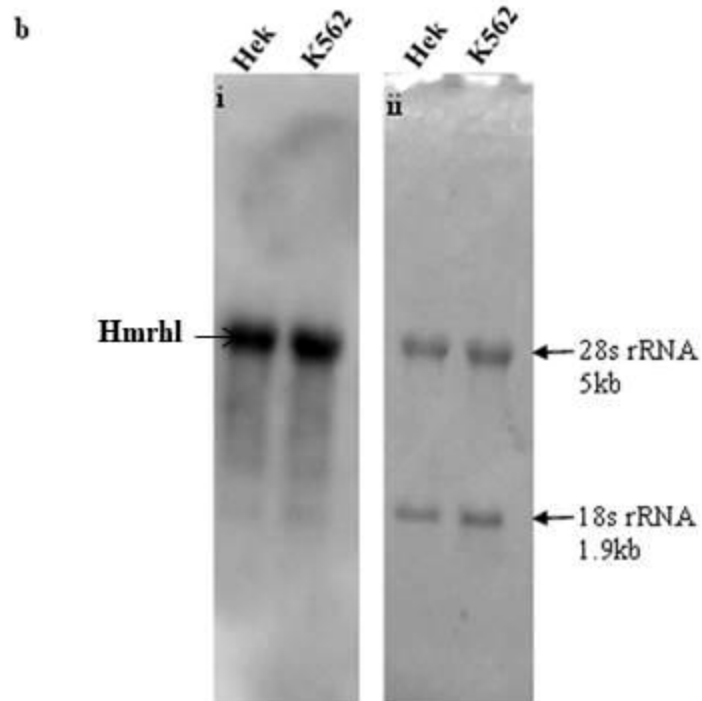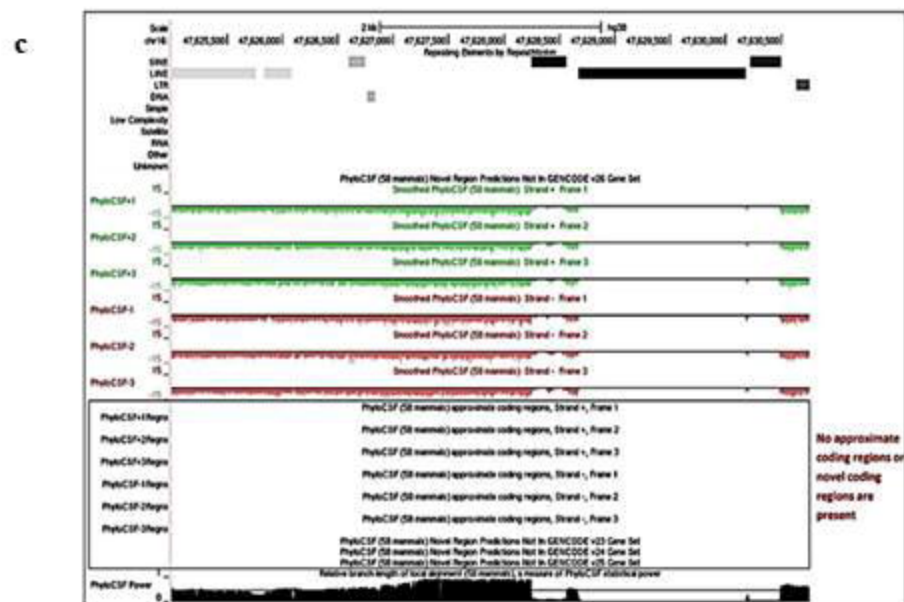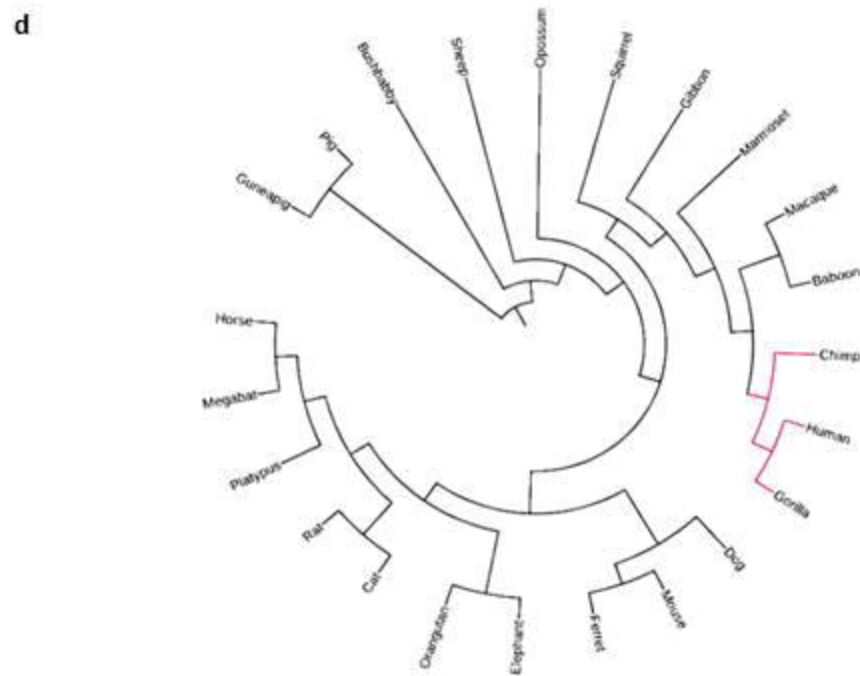

# UCSC Genome Browser on Human Feb. 2009 (GRCh37/hg19) Assembly

move <<< << < > >> >>> zoom in 1.5x 3x 10x base zoom out 1.5x 3x 10x 100x

chr16:47,658,923-47,664,446 5,524 bp. enter position, gene symbol, HGVS or search terms

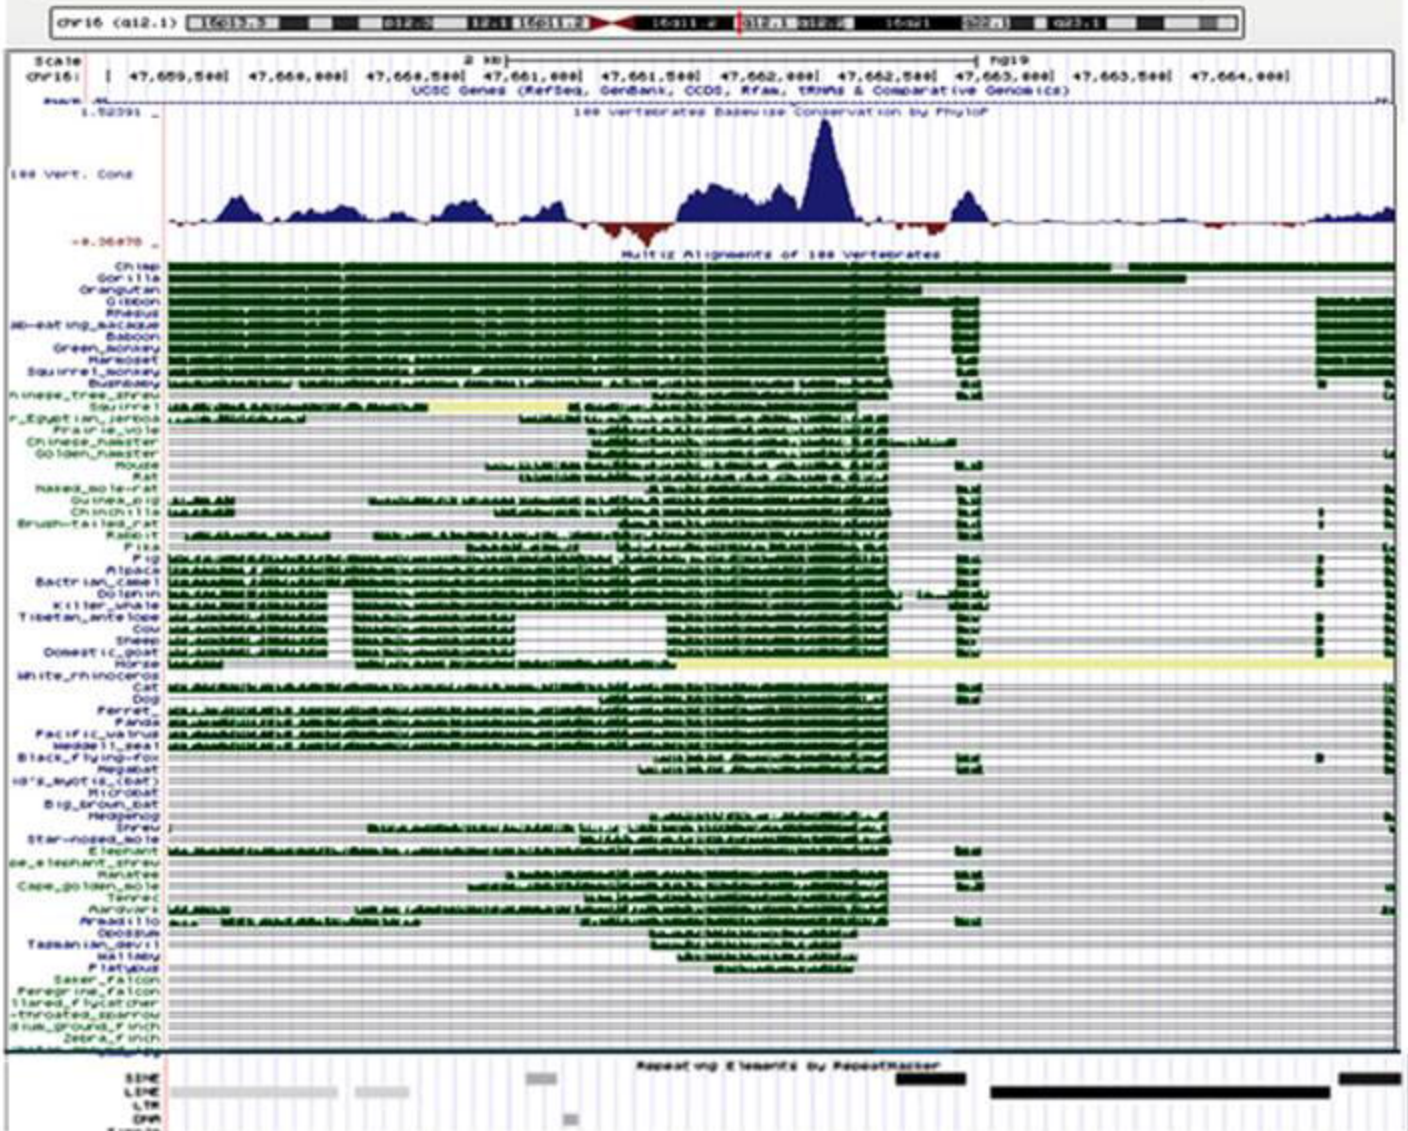

L2B

L2C

MIR

Charlie

AluY

L1PA3

AluX



**a**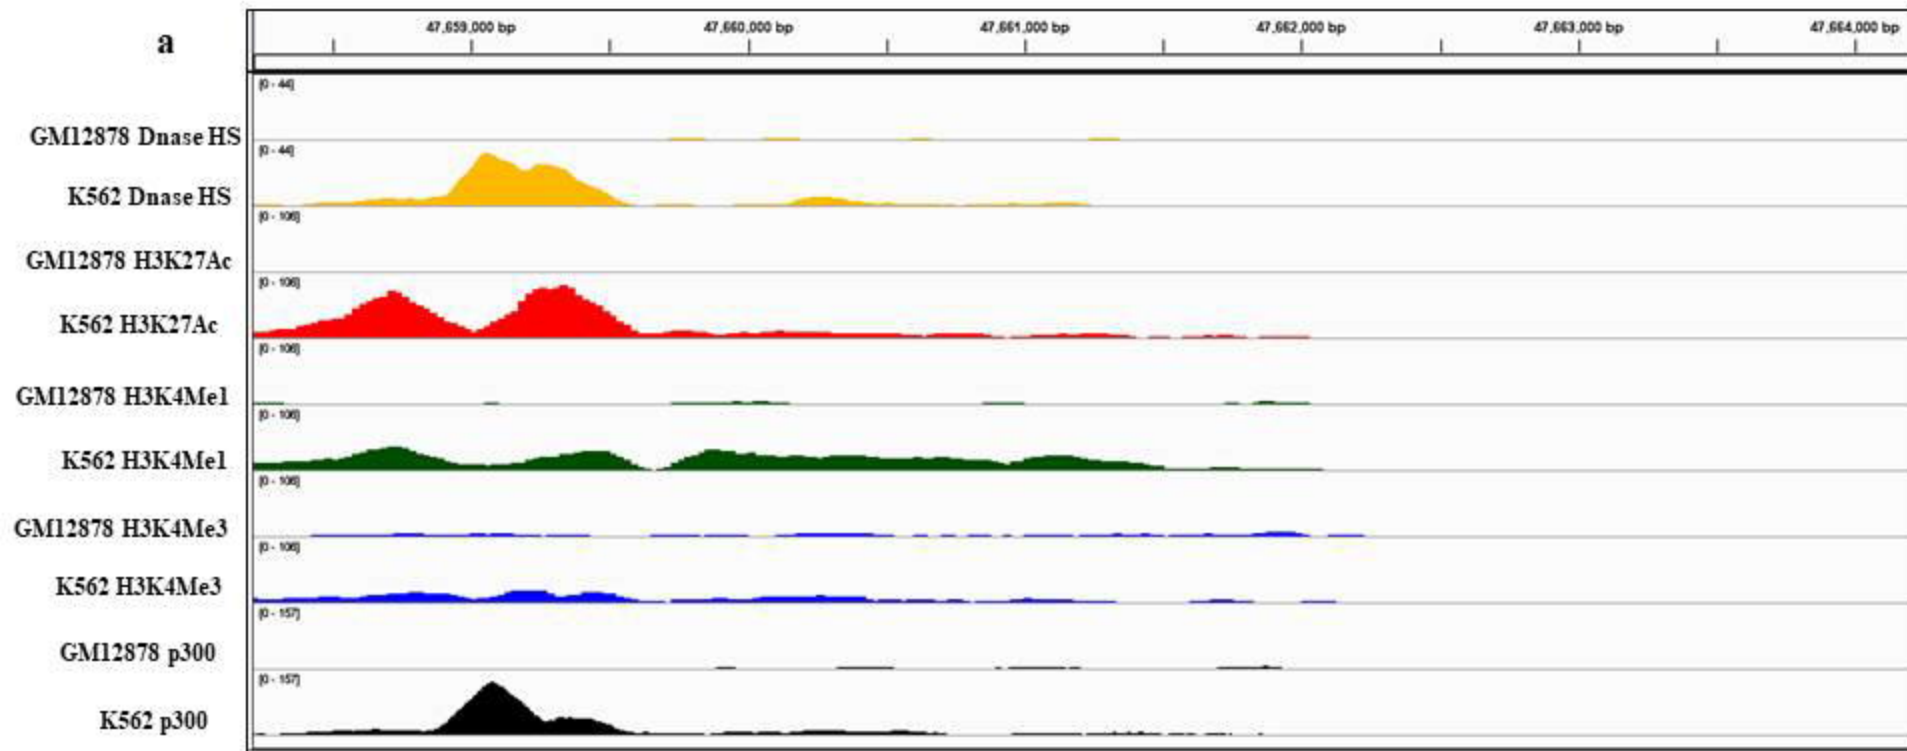**b**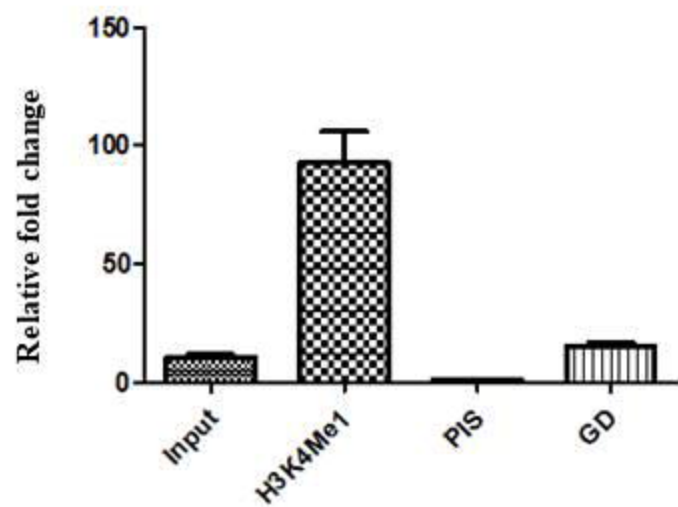**c**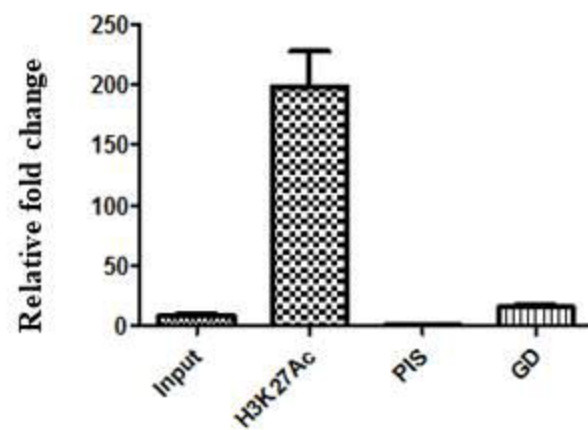

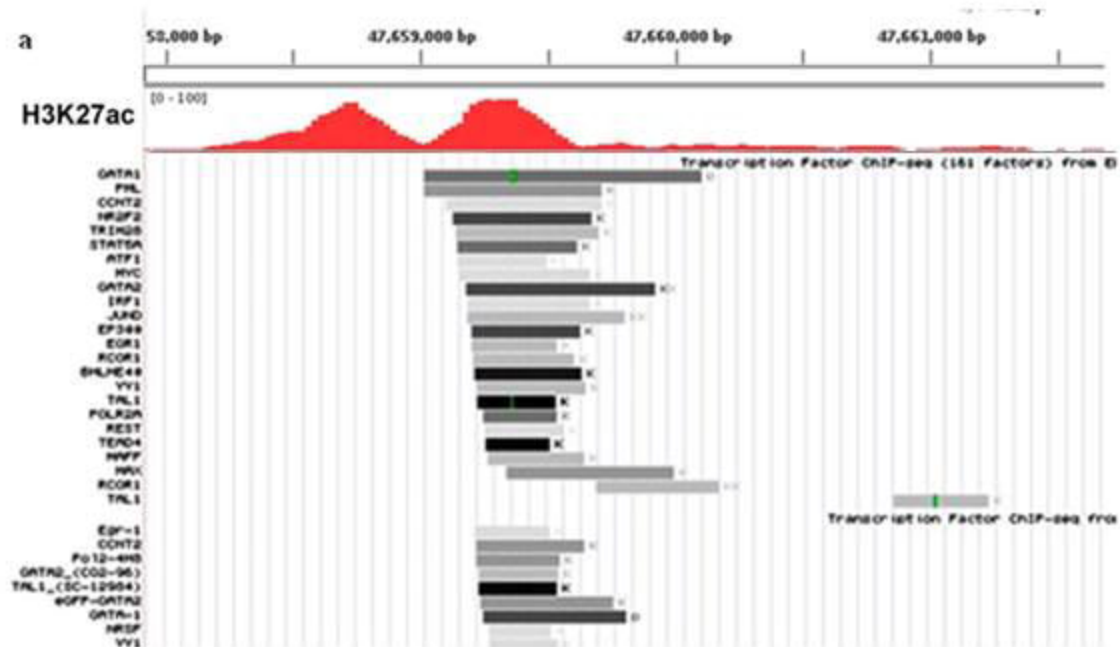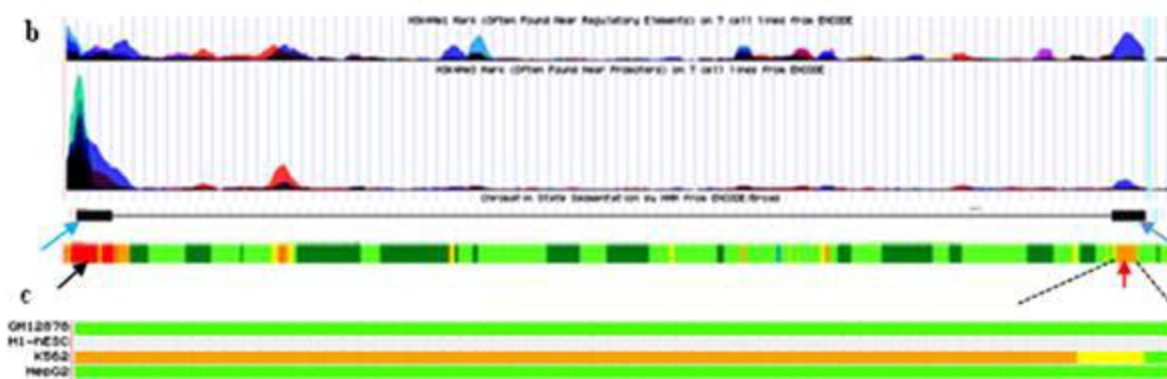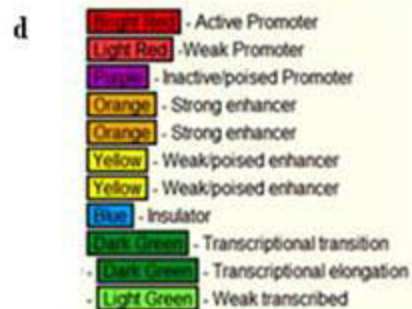

**a**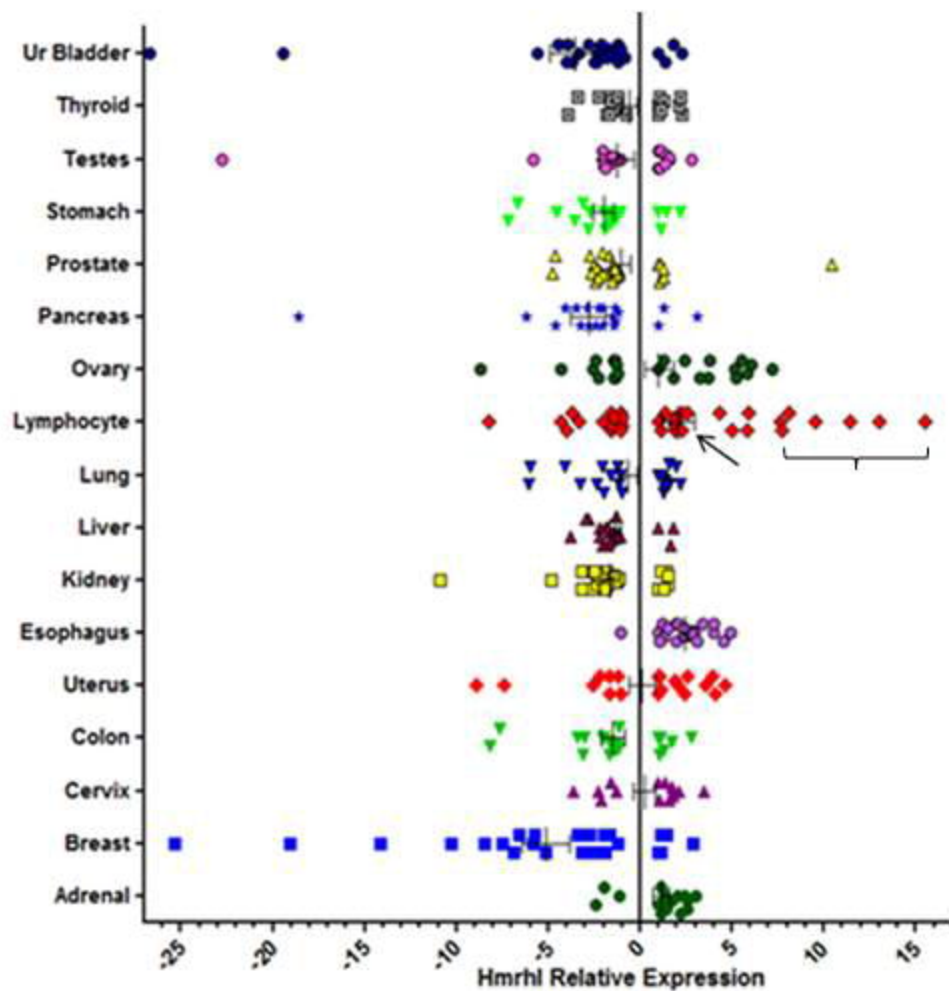**b**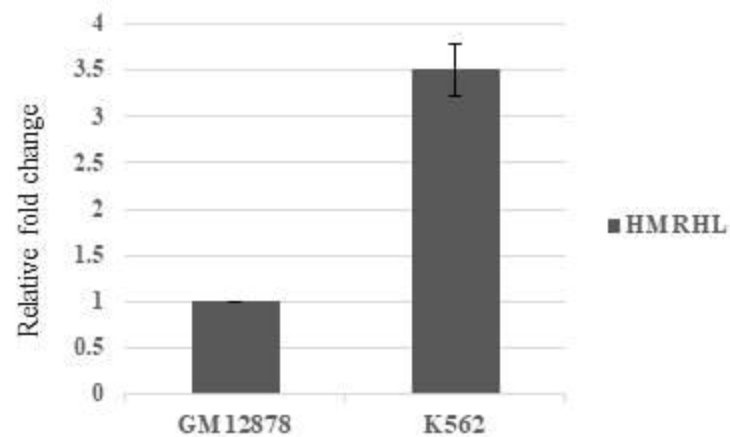**c**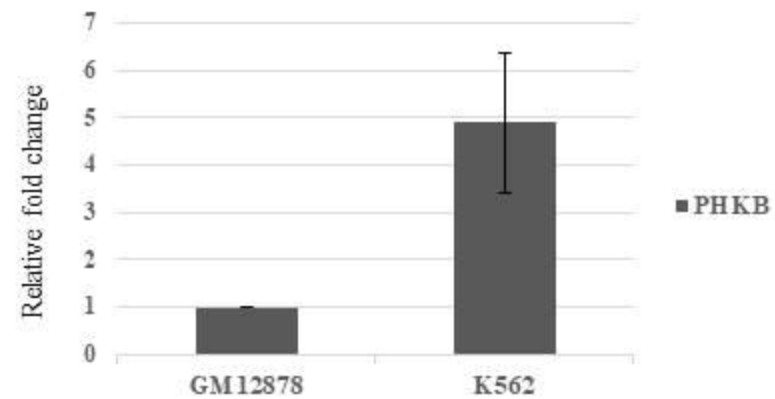

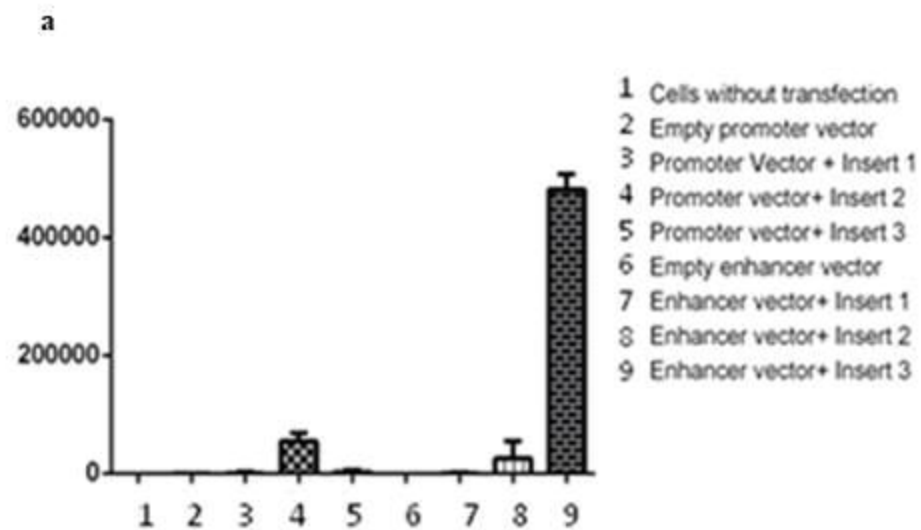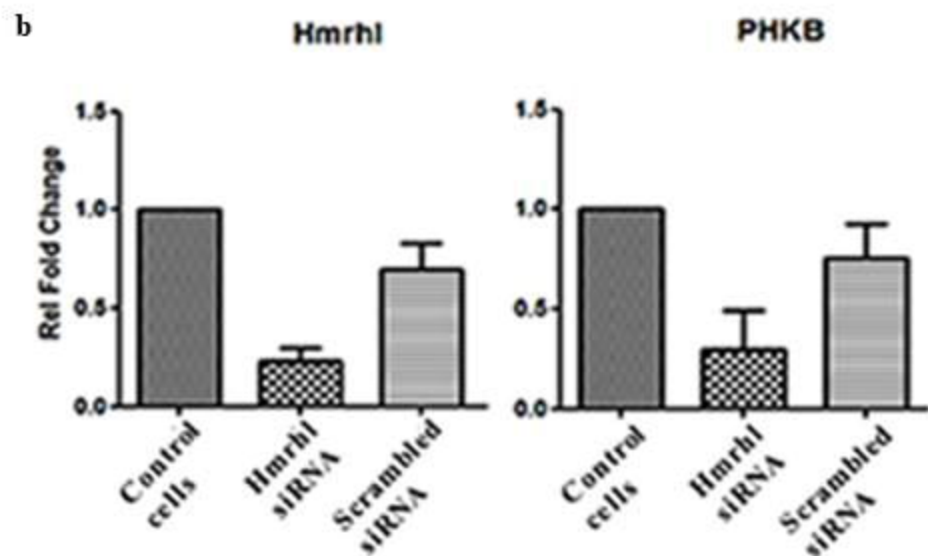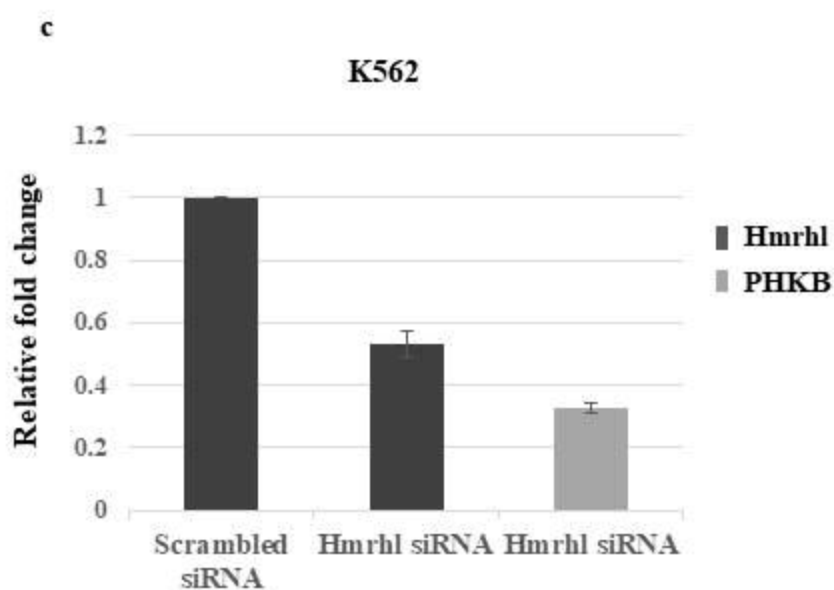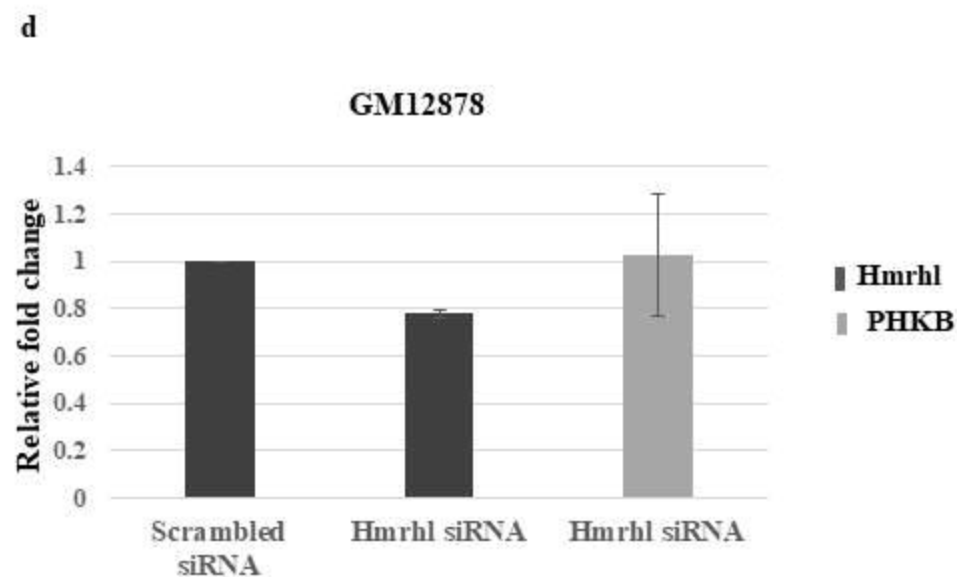

Source: https://www.biorxiv.org/content/10.1101/378984v2.full.pdf
